# Supplementary material for: Hiding and revealing information using the mechanochromic system of a 2,5-dicarbazole-substituted terephthalate derivative
Source: Royal Society of Chemistry journal article supplement (doi:10.1039/c8tc01379a), 2018-01-01
Supplement: c8tc01379a1.pdf [file c8tc01379a1.pdf]

## **Hiding and reading of information in a mechanochromic system of 2,5-dicarbazole-substituted terephthalate derivative**

Pengchong Xue<sup>a</sup> Zicheng Yang,<sup>b</sup> Peng Chen,<sup>b</sup>

<sup>a</sup> Tianjin Key Laboratory of Structure and Performance for Functional Molecules, Key Laboratory of Inorganic-Organic Hybrid Functional Material Chemistry, Ministry of Education, College of Chemistry, Tianjin Normal University, No. 393, Bin Shui West Road, Tianjin, 300387, P.R. China.

<sup>b</sup> Key Laboratory of Functional Inorganic Material Chemistry (MOE), School of Chemistry and Materials Science, Heilongjiang University, No. 74, Xuefu Road, Nangang District, Harbin, 150080, P. R. China

Corresponding author: xuepengchong@126.com

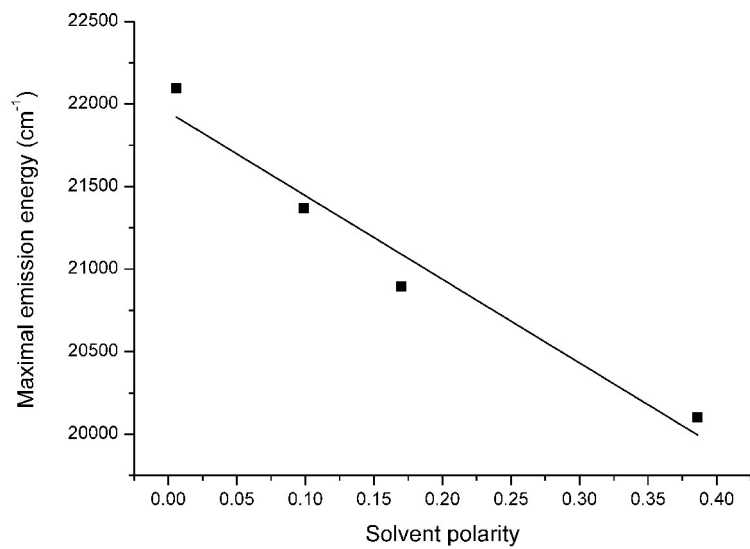

**Fig. S1** Lippert–Mataga plot: fluorescence emission maximum energy of BOCTA as a function of solvent polarity.

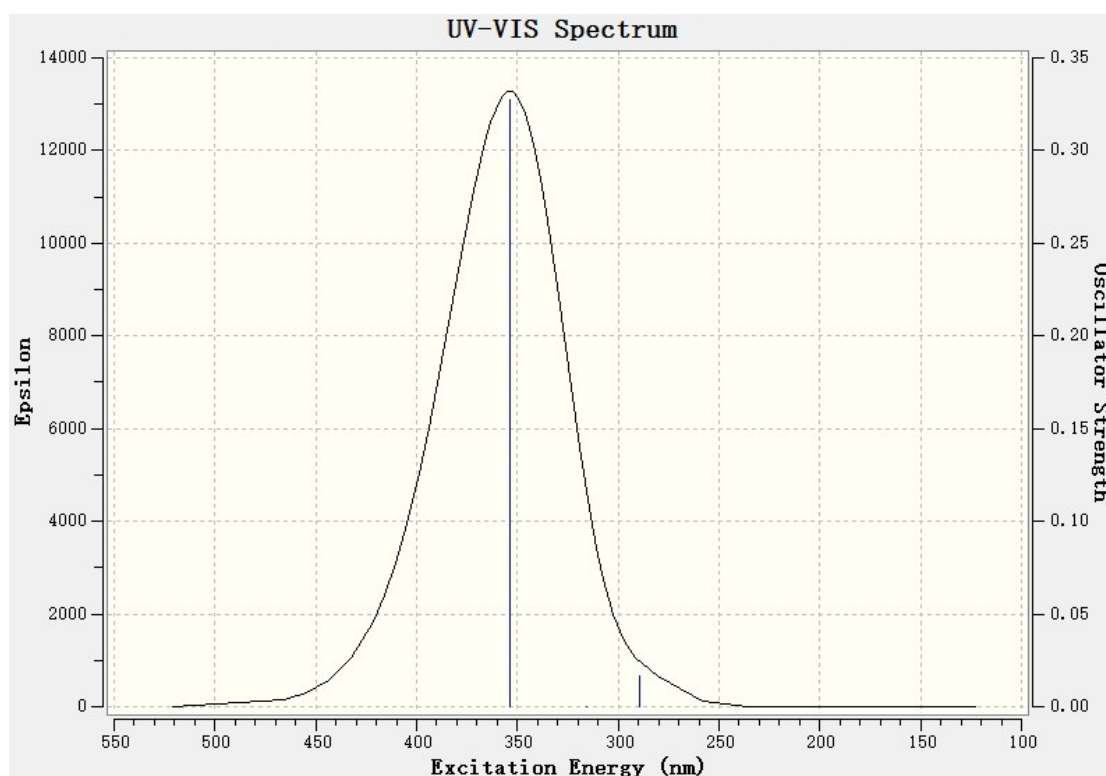

**Fig. S2** Simulated absorption spectrum of BOCTA by the TD/DFT-CAM-B3LYP/6-31G(d) calculation.

**Table S1.** Photophysical data of BOCTA obtained by quantum chemical calculation.

|       | Transition<br>assignment | E (eV)    | $\lambda_{\text{abs}}$ (nm) | Oscillator strength |
|-------|--------------------------|-----------|-----------------------------|---------------------|
|       | HOMO-4→LUMO<br>(7.8%)    |           |                             |                     |
| BOCTA | HOMO-2→LUMO<br>(4.6%)    | 3.5037 eV | 353.87 nm                   | 0.3277              |
|       | HOMO→LUMO<br>(81.8%)     |           |                             |                     |

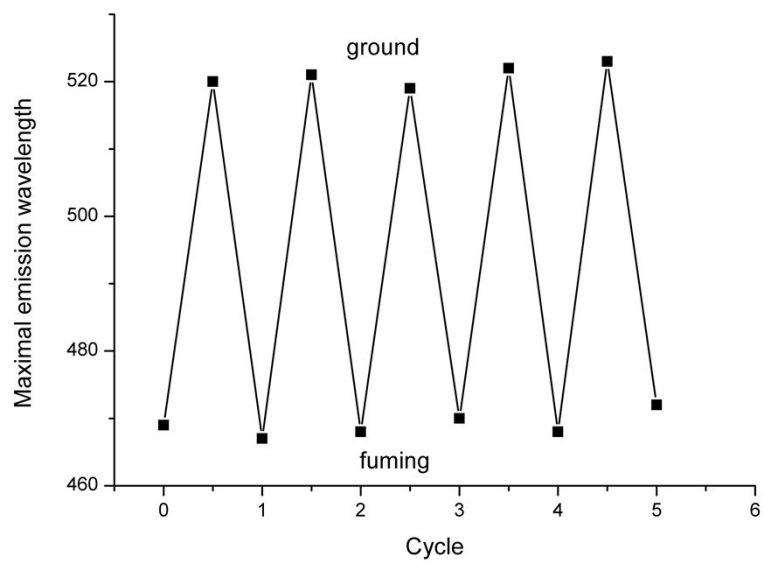

**Fig. S3** Change of maximal emission wavelength during the grinding-fuming cycle.

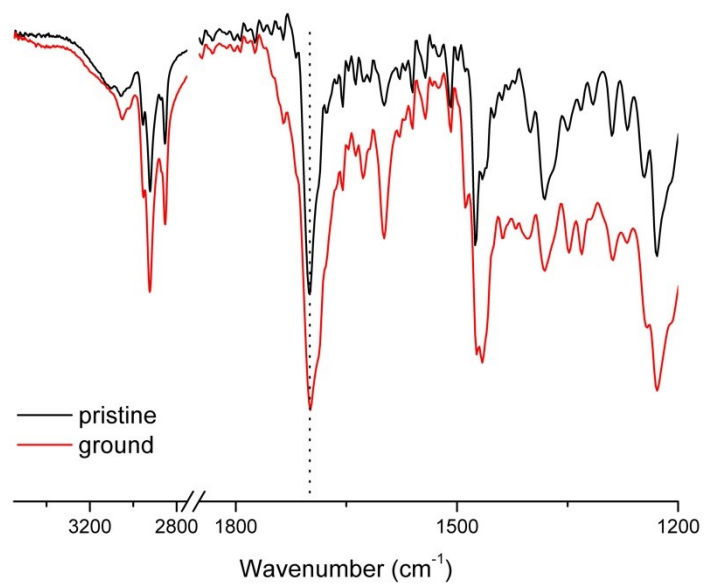

**Fig. S4** FT-IR spectra of pristine and ground solids.

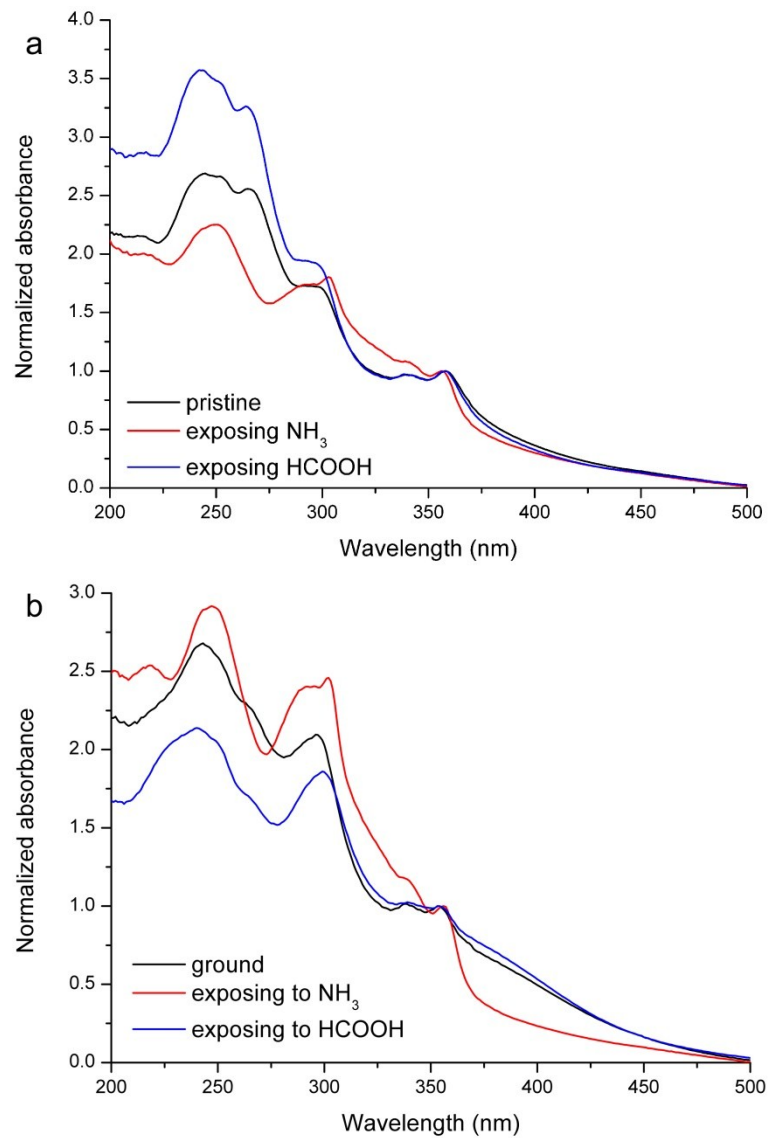

**Fig. S5** UV-vis absorption spectra of (a) pristine and (b) solids upon exposure to  $\text{NH}_3$  and then formic acid vapors.

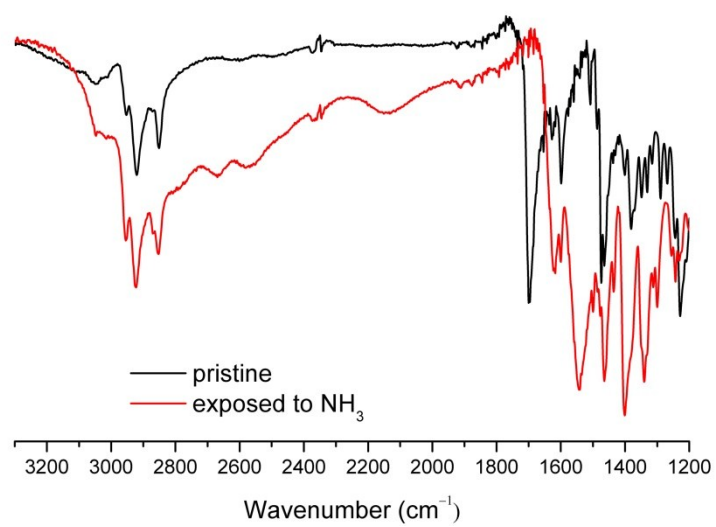

**Fig. S6** FT-IR spectra of pristine and fumed solids.



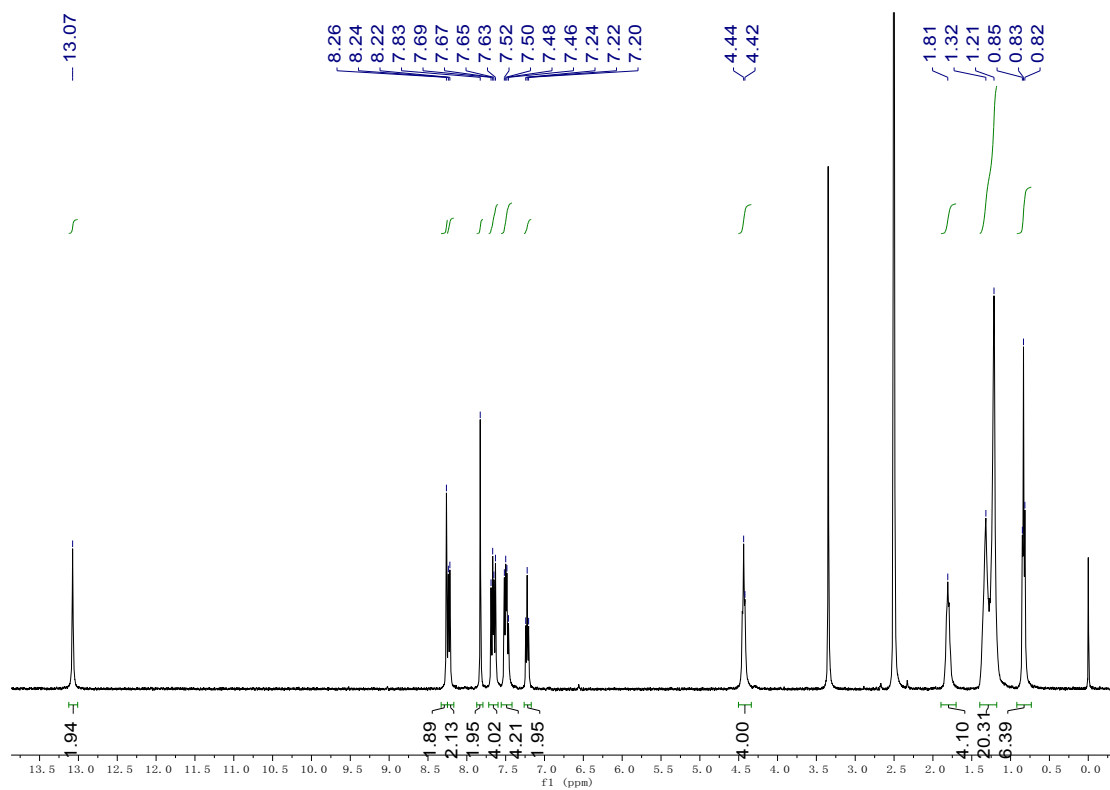

**Fig. S7**  $^1\text{H}$  NMR spectrum of BOCTA in  $D_6$ -DMSO.

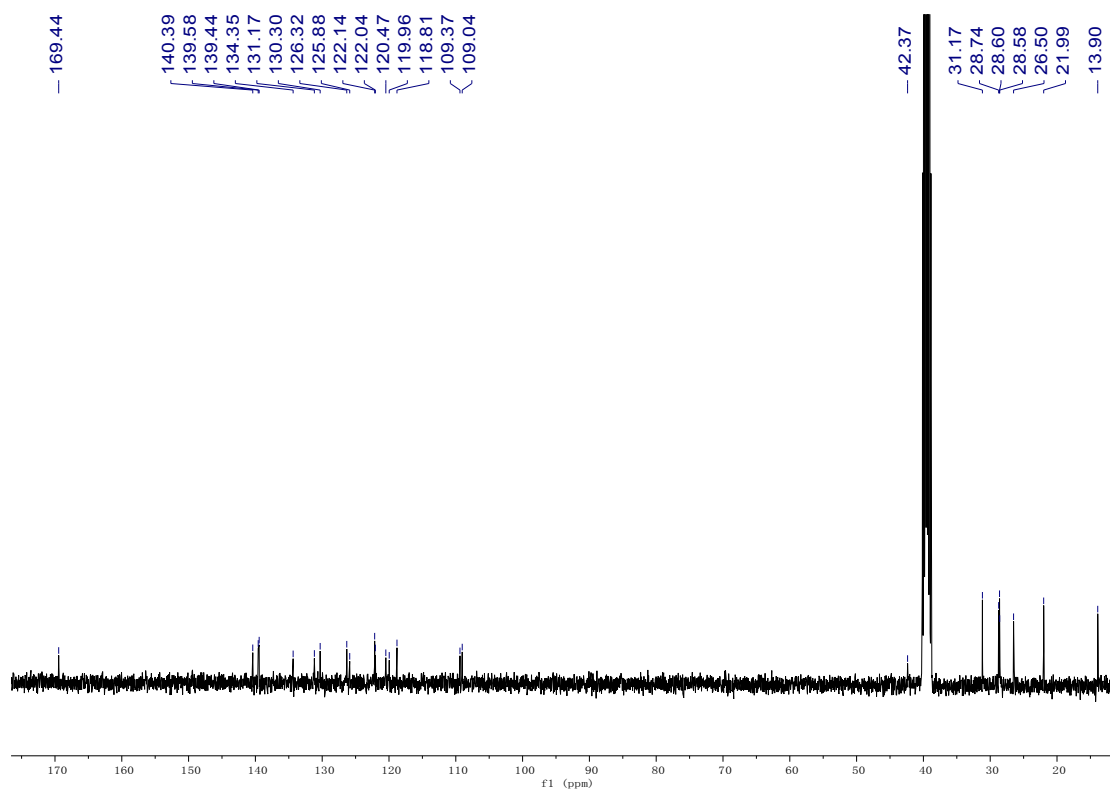

**Fig. S8**  $^{13}\text{C}$  NMR spectrum of BOCTA in  $D_6$ -DMSO.

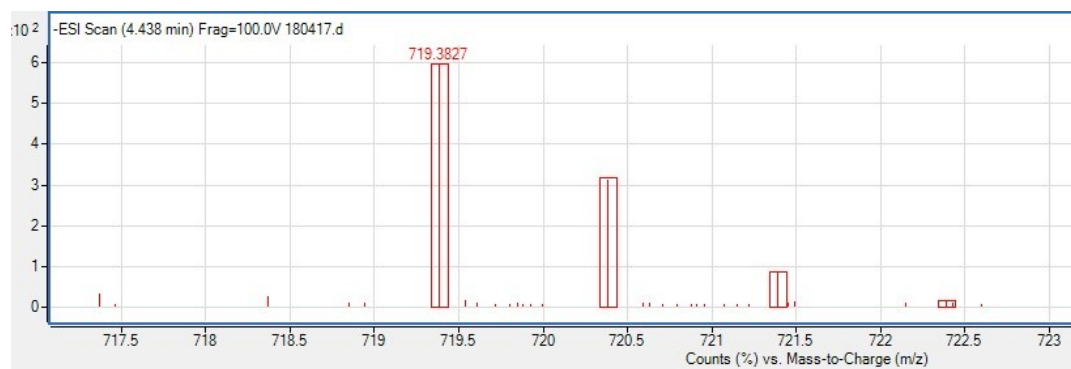

**Fig. S9** HRMS spectrum of BOCTA as anion.
